# Supplementary material
Source: PubMed Central journal article supplement (PMC8386278)
Supplement: NIHMS1718891-supplement-4.pdf [file NIHMS1718891-supplement-4.pdf]

**Supplemental Table 1: Characteristics of 660 Primary GISTs without synchronous metastases**

|                                                                                       |                         | <b>Total<br/>(n=660)</b> | <b>Neo-IM<br/>(n=78)</b> | <b>No Neo-IM<br/>(n=582)</b> | <b>p-value</b>   |       |
|---------------------------------------------------------------------------------------|-------------------------|--------------------------|--------------------------|------------------------------|------------------|-------|
| <b>Survivor follow-up (yrs)</b>                                                       | Median (range)          | 4.60 (0.00-27.7)         | 3.05 (0.01-14.3)         | 4.81 (0.00-27.7)             |                  |       |
| <b>Age at first surgery (yrs)</b>                                                     | Median (range)          | 64.5 (8.07-94.7)         | 60.3 (23.0-86.2)         | 64.9 (8.07-94.7)             | 0.13             |       |
| <b>Sex</b>                                                                            | F                       | 326 (49.4)               | 34 (43.6)                | 292 (50.2)                   | 0.28             |       |
|                                                                                       | M                       | 334 (50.6)               | 44 (56.4)                | 290 (49.8)                   |                  |       |
| <b>Primary tumor site</b>                                                             | Stomach                 | 467 (70.8)               | 40 (51.3)                | 427 (73.4)                   | <0.001           |       |
|                                                                                       | Small Bowel             | 116 (17.6)               | 13 (16.7)                | 103 (17.7)                   |                  |       |
|                                                                                       | Rectum                  | 44 (6.7)                 | 20 (25.6)                | 24 (4.1)                     |                  |       |
|                                                                                       | Other                   | 33 (5)                   | 5 (6.4)                  | 28 (4.8)                     |                  |       |
| <b>Primary tumor size (cm)</b>                                                        | ≤5                      | 327 (49.5)               | 18 (23.1)                | 309 (53.1)                   | <0.001           |       |
|                                                                                       | 5-10                    | 195 (29.5)               | 24 (30.8)                | 171 (29.4)                   |                  |       |
|                                                                                       | >10                     | 138 (20.9)               | 36 (46.2)                | 102 (17.5)                   |                  |       |
| <b>Primary tumor mitotic rate per 50 HPF (pre-treatment or untreated)<sup>a</sup></b> | ≤5                      | 369 (66.2)               | 16 (53.3)                | 353 (67)                     | 0.16             |       |
|                                                                                       | >5                      | 188 (33.8)               | 14 (46.7)                | 174 (33)                     |                  |       |
|                                                                                       | Unknown                 | 103 (N/A)                | 48 (N/A)                 | 55 (N/A)                     |                  |       |
| <b>Histologic variant</b>                                                             | Spindle                 | 355 (76.8)               | 51 (78.5)                | 304 (76.6)                   | 0.90             |       |
|                                                                                       | Epithelioid             | 55 (11.9)                | 8 (12.3)                 | 47 (11.8)                    |                  |       |
|                                                                                       | Mixed                   | 52 (11.3)                | 6 (9.2)                  | 46 (11.6)                    |                  |       |
|                                                                                       | Unknown                 | 198 (N/A)                | 13 (N/A)                 | 185 (N/A)                    |                  |       |
| <b>Margin<sup>b</sup></b>                                                             | R0                      | 597 (90.5)               | 64 (82.1)                | 533 (91.6)                   | 0.015            |       |
|                                                                                       | R1                      | 47 (7.1)                 | 12 (15.4)                | 35 (6)                       |                  |       |
|                                                                                       | R2                      | 16 (2.4)                 | 2 (2.6)                  | 14 (2.4)                     |                  |       |
| <b>Adjuvant imatinib</b>                                                              | No                      | 539 (81.7)               | 42 (53.8)                | 497 (85.4)                   | <0.001           |       |
|                                                                                       | Yes                     | 121 (18.3)               | 36 (46.2)                | 85 (14.6)                    |                  |       |
|                                                                                       | <b>Duration (years)</b> | Median (range)           | 1.71 (0.01-11.6)         | 1.90 (0.01-7.31)             | 1.66 (0.17-11.6) | >0.95 |
|                                                                                       |                         | Median (IQR)             | 1.71 (0.80-3.47)         | 1.90 (0.86-3.05)             | 1.66 (0.73-3.47) |       |
| <b>Mutation<sup>c</sup></b>                                                           | KIT exon 9              | 13 (4.1)                 | 5 (8.8)                  | 8 (3)                        | N/A <sup>d</sup> |       |
|                                                                                       | KIT exon 11 deletion    | 128 (40)                 | 23 (40.4)                | 105 (39.9)                   |                  |       |
|                                                                                       | KIT exon 11 other       | 76 (23.8)                | 12 (21.1)                | 64 (24.3)                    |                  |       |
|                                                                                       | KIT exon 13             | 4 (1.3)                  | 2 (3.5)                  | 2 (0.8)                      |                  |       |
|                                                                                       | KIT exon 17 only        | 1 (0.3)                  | 0 (0)                    | 1 (0.4)                      |                  |       |
|                                                                                       | KIT mult exons          | 7 (2.2)                  | 2 (3.5)                  | 5 (1.9)                      |                  |       |
|                                                                                       | PDGFRA D842V / D842I    | 20 (6.3)                 | 5 (8.8)                  | 15 (5.7)                     |                  |       |
|                                                                                       | PDGFRA other            | 20 (6.3)                 | 1 (1.8)                  | 19 (7.2)                     |                  |       |

|  |                |           |          |           |  |
|--|----------------|-----------|----------|-----------|--|
|  | Wild type (WT) | 47 (14.7) | 7 (12.3) | 40 (15.2) |  |
|  | Unknown        | 340 (N/A) | 21 (N/A) | 319 (N/A) |  |

<sup>a</sup>For patients who underwent Neo-IM, only those who had pre-treatment mitotic rate available are listed, while the “No Neo-IM” values all reflect untreated tumors. Most patients in the Neo-IM group did not have a pre-treatment mitotic rate available, since this requires a core needle biopsy.

<sup>b</sup>R2 margins include incomplete resection and tumor rupture

<sup>c</sup>Mutational analysis in the earliest patients included only *KIT* and *PDGFRA*, thus some “wild type” may reflect alternate mutations/epimutations

<sup>d</sup>Descriptive only, too many variables for statistical comparison. Numbers listed reflect percentage of all patients in whom mutation was known.

**Supplemental Table 2:** Univariate analysis of OS in 69 patients with primary GIST without synchronous metastases undergoing Neo-IM.

| Parameter                                            | Univariate  |           |      |           |         |
|------------------------------------------------------|-------------|-----------|------|-----------|---------|
|                                                      | Class Value | Reference | HR   | CI        | p-value |
| Age at first surgery (yrs)                           | N/A         | N/A       | 1.06 | 1.01-1.11 | 0.017   |
| Sex                                                  | M           | F         | 1.80 | 0.56-5.76 | 0.32    |
| Primary tumor site                                   | Small       | Stomach   | 2.33 | 0.65-8.30 | 0.19    |
|                                                      | Bowel       |           |      |           |         |
|                                                      | Rectum      | Stomach   | 0.67 | 0.08-5.65 | 0.71    |
|                                                      | Other       | Stomach   | 6.30 | 1.45-27.5 | 0.014   |
| Primary tumor size (cm)                              | >10         | ≤5        | 3.25 | 0.40-26.1 | 0.27    |
|                                                      | 5-10        | ≤5        | 2.48 | 0.26-24.0 | 0.43    |
| Histologic variant                                   | Epithelioid | Spindle   | 2.34 | 0.58-9.46 | 0.23    |
|                                                      | Mixed       | Spindle   | 1.44 | 0.29-7.23 | 0.66    |
| Margin                                               | R1          | R0        | 0.36 | 0.05-2.80 | 0.33    |
|                                                      | R2          | R0        | N/A  | N/A       | N/A     |
| Primary tumor post-treatment mitotic rate per 50 HPF | >5          | ≤5        | 3.22 | 0.98-10.6 | 0.055   |
| Primary tumor viability                              | >50%        | ≤50%      | 3.03 | 0.98-9.38 | 0.054   |
| Primary tumor mRECIST                                | PD          | SD        | 0.31 | 0.04-2.43 | 0.26    |
|                                                      | PR          | SD        | 0.47 | 0.10-2.18 | 0.33    |
| Adjuvant imatinib                                    | Yes         | No        | 0.52 | 0.16-1.67 | 0.27    |

**Supplemental Table 3: Characteristics of 128 Primary GISTs with synchronous metastases**

|                                                                                       |                         | <b>Total<br/>(n=128)</b> | <b>Neo-IM<br/>(n=72)</b> | <b>No Neo-IM<br/>(n=56)</b> | <b>p-value</b>   |      |
|---------------------------------------------------------------------------------------|-------------------------|--------------------------|--------------------------|-----------------------------|------------------|------|
| <b>Survivor follow-up (yrs)</b>                                                       | Median (range)          | 4.44 (0.20-21.7)         | 4.56 (0.20-12.5)         | 3.77 (0.77-21.7)            |                  |      |
| <b>Age at first surgery (yrs)</b>                                                     | Median (range)          | 56.6 (22.6-85.3)         | 57.1 (24.6-85.3)         | 54.9 (22.6-84.5)            | 0.65             |      |
| <b>Sex</b>                                                                            | F                       | 47 (36.7)                | 27 (37.5)                | 20 (35.7)                   | 0.86             |      |
|                                                                                       | M                       | 81 (63.3)                | 45 (62.5)                | 36 (64.3)                   |                  |      |
| <b>Primary tumor site</b>                                                             | Stomach                 | 59 (46.1)                | 34 (47.2)                | 25 (44.6)                   | 0.90             |      |
|                                                                                       | Small Bowel             | 55 (43)                  | 31 (43.1)                | 24 (42.9)                   |                  |      |
|                                                                                       | Other                   | 14 (10.9)                | 7 (9.7)                  | 7 (12.5)                    |                  |      |
| <b>Primary tumor size (cm)</b>                                                        | ≤5                      | 17 (13.5)                | 10 (14.1)                | 7 (12.7)                    | 0.85             |      |
|                                                                                       | 5-10                    | 40 (31.7)                | 21 (29.6)                | 19 (34.5)                   |                  |      |
|                                                                                       | >10                     | 69 (54.8)                | 40 (56.3)                | 29 (52.7)                   |                  |      |
|                                                                                       | Unknown                 | 2 (N/A)                  | 1 (N/A)                  | 1 (N/A)                     |                  |      |
| <b>Primary tumor mitotic rate per 50 HPF (pre-treatment or untreated)<sup>a</sup></b> | ≤5                      | 8 (20.5)                 | 3 (20)                   | 5 (20.8)                    | >0.95            |      |
|                                                                                       | >5                      | 31 (79.5)                | 12 (80)                  | 19 (79.2)                   |                  |      |
|                                                                                       | Unknown                 | 89 (N/A)                 | 57 (N/A)                 | 32 (N/A)                    |                  |      |
| <b>Histologic variant</b>                                                             | Spindle                 | 59 (67)                  | 44 (69.8)                | 15 (60)                     | 0.68             |      |
|                                                                                       | Epithelioid             | 12 (13.6)                | 8 (12.7)                 | 4 (16)                      |                  |      |
|                                                                                       | Mixed                   | 17 (19.3)                | 11 (17.5)                | 6 (24)                      |                  |      |
|                                                                                       | Unknown                 | 40 (N/A)                 | 9 (N/A)                  | 31 (N/A)                    |                  |      |
| <b>Margin<sup>b</sup></b>                                                             | R0                      | 49 (38.6)                | 31 (43.1)                | 18 (32.7)                   | 0.12             |      |
|                                                                                       | R1                      | 22 (17.3)                | 15 (20.8)                | 7 (12.7)                    |                  |      |
|                                                                                       | R2                      | 56 (44.1)                | 26 (36.1)                | 30 (54.5)                   |                  |      |
|                                                                                       | Unknown                 | 1 (N/A)                  | 0 (N/A)                  | 1 (N/A)                     |                  |      |
| <b>Adjuvant imatinib</b>                                                              | No                      | 52 (40.9)                | 16 (22.5)                | 36 (64.3)                   | <0.001           |      |
|                                                                                       | Yes                     | 75 (59.1)                | 55 (77.5)                | 20 (35.7)                   |                  |      |
|                                                                                       | Unknown                 | 1 (N/A)                  | 1 (N/A)                  | 0 (N/A)                     |                  |      |
|                                                                                       | <b>Duration (years)</b> | Median (range)           | 2.56 (0.16-9.51)         | 2.72 (0.16-9.45)            | 2.44 (0.28-9.51) | 0.88 |
|                                                                                       |                         | Median (IQR)             | 2.56 (0.97-4.44)         | 2.72 (0.97-4.44)            | 2.44 (1.24-4.53) |      |
| <b>Mutation<sup>c</sup></b>                                                           | KIT exon 9              | 11 (10.9)                | 8 (12.5)                 | 3 (8.1)                     | N/A <sup>d</sup> |      |
|                                                                                       | KIT exon 11 deletion    | 43 (42.6)                | 30 (46.9)                | 13 (35.1)                   |                  |      |
|                                                                                       | KIT exon 11 other       | 11 (10.9)                | 6 (9.4)                  | 5 (13.5)                    |                  |      |
|                                                                                       | KIT exon 13             | 3 (3)                    | 1 (1.6)                  | 2 (5.4)                     |                  |      |
|                                                                                       | KIT mult exons          | 16 (15.8)                | 13 (20.3)                | 3 (8.1)                     |                  |      |
|                                                                                       | PDGFRA other            | 3 (3)                    | 2 (3.1)                  | 1 (2.7)                     |                  |      |
|                                                                                       | SDH                     | 2 (2)                    | 0 (0)                    | 2 (5.4)                     |                  |      |
|                                                                                       | Wild type (WT)          | 12 (11.9)                | 4 (6.3)                  | 8 (21.6)                    |                  |      |
| Unknown                                                                               | 27 (N/A)                | 8 (N/A)                  | 19 (N/A)                 |                             |                  |      |

<sup>a</sup>For patients who underwent Neo-IM, only those who had pre-treatment mitotic rate available are listed, while the “No Neo-IM” values all reflect untreated tumors. Most patients in the Neo-IM group did not have a pre-treatment mitotic rate available, since this requires a core needle biopsy.

<sup>b</sup>R2 margins include incomplete resection and tumor rupture

<sup>c</sup>Mutational analysis in the earliest patients included only *KIT* and *PDGFRA*, thus some “wild type” may reflect alternate mutations/epimutations

<sup>d</sup>Descriptive only, too many variables for statistical comparison. Numbers listed reflect percentage of all patients in whom mutation was known.

**Supplemental Table 4:** Univariate analysis of OS in 56 patients with primary GIST with synchronous metastases undergoing Neo-IM.

| Parameter                                            | Univariate  |           |      |           |         |
|------------------------------------------------------|-------------|-----------|------|-----------|---------|
|                                                      | Class Value | Reference | HR   | CI        | p-value |
| Age at first surgery (yrs)                           | N/A         | N/A       | 1.05 | 1.00-1.09 | 0.039   |
| Sex                                                  | M           | F         | 1.16 | 0.47-2.88 | 0.74    |
| Primary tumor site                                   | Small Bowel | Stomach   | 1.05 | 0.40-2.73 | 0.92    |
|                                                      | Other       | Stomach   | 2.17 | 0.65-7.23 | 0.21    |
| Primary tumor size (cm)                              | >10         | ≤5        | 0.82 | 0.23-2.93 | 0.76    |
|                                                      | 5-10        | ≤5        | 0.78 | 0.19-3.17 | 0.73    |
| Histologic variant                                   | Epithelioid | Spindle   | 0.81 | 0.18-3.61 | 0.78    |
|                                                      | Mixed       | Spindle   | 1.79 | 0.62-5.13 | 0.28    |
| Margin                                               | R1          | R0        | 3.26 | 0.93-11.4 | 0.064   |
|                                                      | R2          | R0        | 4.76 | 1.65-13.7 | 0.004   |
| Primary tumor post-treatment mitotic rate per 50 HPF | >5          | ≤5        | 4.39 | 1.67-11.5 | 0.003   |
| Primary tumor viability                              | >50%        | ≤50%      | 1.02 | 0.39-2.70 | >0.95   |
| Primary tumor mRECIST                                | PD          | SD        | 6.35 | 1.22-33.0 | 0.028   |
|                                                      | PR          | SD        | 1.26 | 0.49-3.26 | 0.63    |
| Adjuvant imatinib                                    | Yes         | No        | 0.20 | 0.08-0.52 | <0.001  |

**Supplemental Table 5:** Mutational analysis by response category.

| Mutation*         | Mitotic rate / 50 HPF |    |      | Tumor viability % |     |       | mRECIST |    |    |      |      |
|-------------------|-----------------------|----|------|-------------------|-----|-------|---------|----|----|------|------|
|                   | >5                    | ≤5 | % >5 | >50               | ≤50 | % >50 | PD      | SD | PR | % PD | % PR |
| KIT exon 9        | 4                     | 7  | 30.7 | 7                 | 4   | 63.6  | 1       | 7  | 4  | 8.3  | 33.3 |
| KIT exon 11 del   | 12                    | 31 | 27.9 | 13                | 36  | 26.5  | 4       | 23 | 20 | 8.5  | 42.6 |
| KIT exon 11 other | 3                     | 11 | 21.4 | 2                 | 12  | 14.2  | 1       | 9  | 9  | 5.3  | 47.4 |
| KIT exon 13       | 1                     | 2  | 33.3 | 2                 | 1   | 66.6  | 0       | 1  | 1  | 0.0  | 50.0 |
| KIT mult exon     | 6                     | 6  | 50.0 | 5                 | 8   | 50.0  | 1       | 4  | 4  | 11.1 | 44.4 |
| PDGFRA<br>D842V/I | 1                     | 4  | 20.0 | 2                 | 2   | 50.0  | 3       | 2  | 2  | 42.9 | 28.6 |
| PDGFRA other      | 1                     | 1  | 50.0 | 0                 | 3   | 0.0   | 0       | 2  | 2  | 0.0  | 50.0 |

\*The first two columns for each parameter show the number of patients in that group. In the additional column(s), percentages reflect proportion of listed mutation for that parameter. For example, % >5 mitoses/50HPF for KIT exon 9 is 4 of 11, or 30.7%. Numbers vary slightly for each parameter due to different numbers of patients evaluable for each parameter. Wild type was excluded from this analysis since early “wild types” were only tested for KIT and PDGFRA and not alternate mutations/epimutations.
